# Supplementary material for: Experiences of noninvasive ventilation in adults with hypercapnic respiratory failure: a review of evidence
Source: PubMed Central journal article supplement — Eur Respir Rev. 2016 Dec;25(142):451–71. doi: 10.1183/16000617.0002-2016 (PMC9487549; doi:10.1183/16000617.0002-2016), 2016-12
Supplement: Online_supplement.pdf [file Online_supplement.pdf]

Table S1

**Search strategy**

| <b>PubMed</b><br><b>Limits: All Adult:18+ years,</b><br><b>English, Only items with abstracts,</b><br><b>Human.</b> | <b>Hits</b> | <b>Identified and</b><br><b>examined</b><br><b>abstracts</b> | <b>Saved</b><br><b>Abstracts</b> | <b>Abstracts</b><br><b>not include</b>                           |
|---------------------------------------------------------------------------------------------------------------------|-------------|--------------------------------------------------------------|----------------------------------|------------------------------------------------------------------|
| NIV*                                                                                                                | 4608        | 9                                                            | 5                                | 4                                                                |
| CPAP*                                                                                                               | 5828        | 13                                                           | 7                                | 6                                                                |
| NIV AND elderly patient                                                                                             | 1901        | 5                                                            | 1                                | 4                                                                |
| CPAP AND elderly patient                                                                                            | 2763        | 5                                                            | 0                                | 5                                                                |
| NIV AND patient experience                                                                                          | 233         | 4                                                            | 2                                | 2                                                                |
| CPAP AND patient experience                                                                                         | 197         | 6                                                            | 4                                | 2                                                                |
| NIV AND compliance                                                                                                  | 205         | 1                                                            | 1                                | 0                                                                |
| CPAP AND compliance                                                                                                 | 796         | 4                                                            | 2                                | 2                                                                |
| NIV AND respiratory failure                                                                                         | 2082        | 4                                                            | 1                                | 3                                                                |
| CPAP AND patient attitude                                                                                           | 40          | 6                                                            | 5                                | 1                                                                |
| NIV AND patient attitude                                                                                            | 29          | 2                                                            | 1                                | 1                                                                |
| CPAP AND patient perception                                                                                         | 55          | 0                                                            | 0                                | 0                                                                |
| NIV AND patient perception                                                                                          | 20          | 1                                                            | 1                                | 0                                                                |
| Summary                                                                                                             |             | 60                                                           | 30                               | 30                                                               |
| <b>CINAHL</b><br><b>Limits: English, Abstracts</b>                                                                  | <b>Hits</b> | <b>Identified and</b><br><b>examined</b><br><b>abstracts</b> | <b>Saved</b><br><b>abstracts</b> | <b>Abstracts</b><br><b>also in PubMed</b><br><b>Not included</b> |
| NIV                                                                                                                 | 94          | 6                                                            | 2                                | 4                                                                |
| CPAP                                                                                                                | 1041        | 10                                                           | 4                                | 6                                                                |
| NIV AND elderly patient                                                                                             | 1           | 0                                                            | 0                                | 0                                                                |
| CPAP AND elderly patient                                                                                            | 8           | 0                                                            | 0                                | 0                                                                |
| NIV AND patient experience                                                                                          | 6           | 0                                                            | 0                                | 0                                                                |
| CPAP AND patient experience                                                                                         | 18          | 4                                                            | 3                                | 1                                                                |
| NIV AND compliance                                                                                                  | 5           | 0                                                            | 0                                | 0                                                                |
| CPAP AND compliance                                                                                                 | 180         | 7                                                            | 4                                | 3                                                                |
| NIV AND respiratory failure                                                                                         | 42          | 3                                                            | 0                                | 3                                                                |
| CPAP AND patient attitude                                                                                           | 12          | 6                                                            | 1                                | 5                                                                |
| NIV AND patient attitude                                                                                            | 3           | 2                                                            | 1                                | 1                                                                |
| CPAP AND patient perception                                                                                         | 2           | 0                                                            | 0                                | 0                                                                |
| NIV AND patient perception                                                                                          | 1           | 1                                                            | 0                                | 1                                                                |
| Summary                                                                                                             |             | 39                                                           | 15                               | 24                                                               |

\*NIV= *non-invasive ventilation OR non-invasive positive pressure ventilation OR non-invasive mechanical ventilation* as keywords searched for together. \*CPAP= *Continuous positive airway pressure*

Table S2

**A hierarchy of evidence-for-practice in qualitative research**

| <b>Type of Study</b>            | <b>Features</b>                                                                                                                                                                                                                            | <b>Limitations</b>                                                                                                                                              | <b>Evidence for Practice</b>                                                                                                                                                                           |
|---------------------------------|--------------------------------------------------------------------------------------------------------------------------------------------------------------------------------------------------------------------------------------------|-----------------------------------------------------------------------------------------------------------------------------------------------------------------|--------------------------------------------------------------------------------------------------------------------------------------------------------------------------------------------------------|
| Generalizable studies (level I) | Sampling focused by theory and the literature, extended as a result of analysis to capture diversity of experience. Analytic procedures comprehensive and clear. Located in the literature to assess relevance to other settings.          | Main limitations are in reporting when the word length of articles does not allow a comprehensive account of complex procedures.                                | Clear indications for practice or policy may offer support for current practice, or critique with indicated directions for change.                                                                     |
| Conceptual studies (level II)   | Theoretical concepts guide sample selection, based on analysis of literature. May be limited to one group about which little is known or a number of important subgroups. Conceptual analysis recognizes diversity in participants' views. | Theoretical concepts and minority or divergent views that emerge during analysis do not lead to further sampling. Categories for analysis may not be saturated. | Weaker designs identify the need for further research on other groups, or urge caution in practice. Well-developed studies can provide good evidence if residual uncertainties are clearly identified. |
| Descriptive studies (level III) | Sample selected to illustrate practical rather than theoretical issues. Record a range of illustrative quotes including themes from the accounts of "many," "most," or "some" study participants.                                          | Do not report full range of responses. Sample not diversified to analyse how or why differences occur.                                                          | Demonstrate that a phenomenon exists in a defined group. Identify practice issues for further consideration.                                                                                           |
| Single case study (level IV)    | Provides rich data on the views or experiences of one person. Can provide insights in unexplored contexts.                                                                                                                                 | Does not analyse applicability to other contexts.                                                                                                               | Alerts practitioners to the existence of an unusual phenomenon.                                                                                                                                        |

A hierarchy of evidence-for-practice in qualitative research—summary features (reproduced from Daly et al., 2007)
